# Supplementary material for: Antiviral efficacy against and replicative fitness of an XBB.1.9.1 clinical isolate
Source: PubMed Central journal article supplement — iScience. 2023 Oct 4;26(11):108147. doi: 10.1016/j.isci.2023.108147 (PMC10590837; doi:10.1016/j.isci.2023.108147), 2023-10-04
Supplement: mmc1.pdf [file mmc1.pdf]

## **Supplemental information**

### **Antiviral efficacy against and replicative fitness of an XBB.1.9.1 clinical isolate**

**Ryuta Uraki, Mutsumi Ito, Maki Kiso, Seiya Yamayoshi, Kiyoko Iwatsuki-Horimoto, Yuko Sakai-Tagawa, Masaki Imai, Michiko Koga, Shinya Yamamoto, Eisuke Adachi, Makoto Saito, Takeya Tsutsumi, Amato Otani, Shuetsu Fukushi, Shinji Watanabe, Tadaki Suzuki, Tetsuhiro Kikuchi, Hiroshi Yotsuyanagi, Ken Maeda, and Yoshihiro Kawaoka**

**A**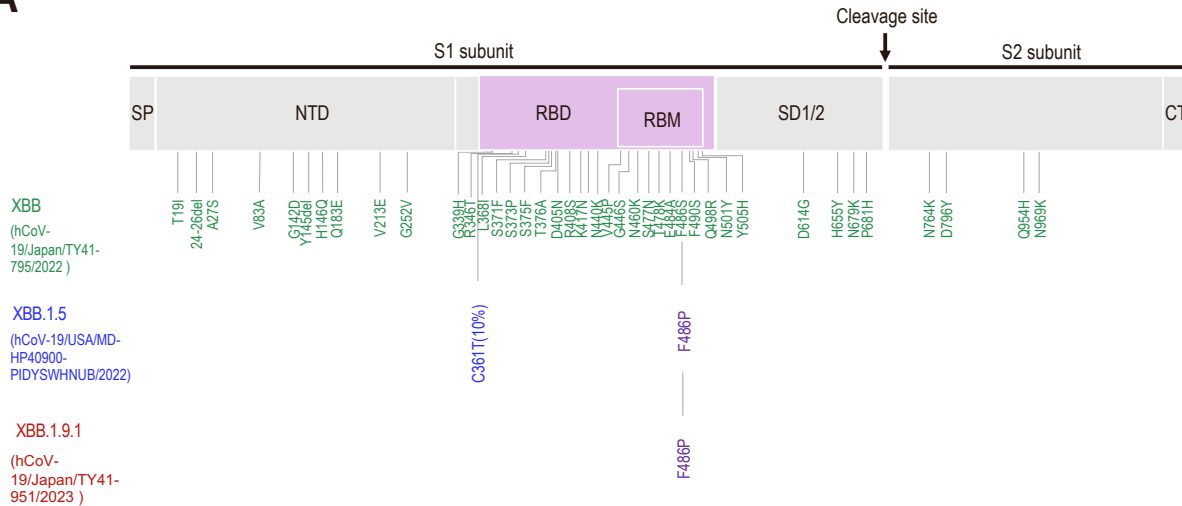**B**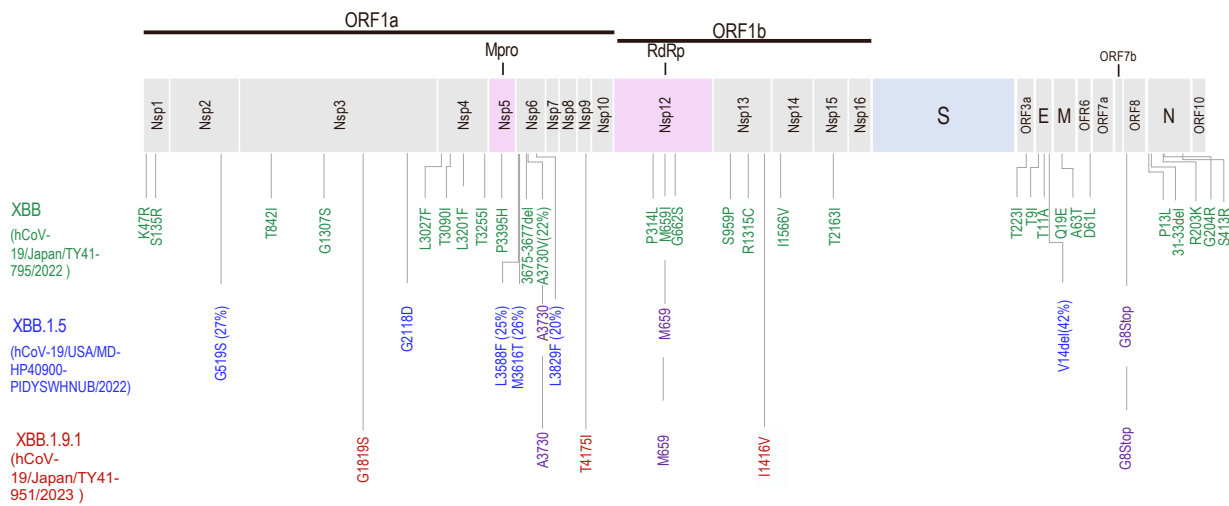**Figure S1. Mutations of Omicron subvariants, related to Figure 1 and 2.**

(A) Spike (S) protein substitutions in the XBB.1.9.1 clinical isolate used in this study. Compared with XBB (hCoV-19/Japan/TY41-795/2022), substitutions are shown in blue for XBB.1.5 (hCoV-19/USA/MD-HP40900-PIDYSWHNUB/2022). The conserved substitutions between XBB.1.5 and XBB.1.9.1 (hCoV-19/Japan/TY41-951/2023) are shown in purple. The S protein comprises two subunits, S1 and S2. The arrow indicates the S1/S2 proteolytic cleavage site. SP, signal peptide; NTD, N-terminal domain; RBD, receptor-binding domain; RBM, receptor-binding motif; SD1/2, subdomain 1 and 2; and CT, cytoplasmic tail.

(B) Non-spike protein substitutions in the XBB.1.9.1 clinical isolate used in this study. Compared with XBB (hCoV-19/Japan/TY41-795/2022), substitutions are shown in blue for XBB.1.5 (hCoV-19/USA/MD-HP40900-PIDYSWHNUB/2022) and red for XBB.1.9.1 (hCoV-19/Japan/TY41-951/2023). The conserved substitutions between XBB.1.5 and XBB.1.9.1 are shown in purple. ORF, open reading frame; Mpro, main protease; RdRp, RNA-dependent RNA polymerase; S, Spike; E, Envelope; M, Membrane; and N, Nucleocapsid.

**Table S1. Neutralizing antibody titers of human plasma from individuals who received four doses of COVID-19 monovalent mRNA vaccine, related to Figure 1**

| Sample ID | Age | Gender | Plasma collection day post-final vaccination | Vaccine                     | FRNT50: 50% focus reduction neutralization titer |                                           |                                                          |                                                 |
|-----------|-----|--------|----------------------------------------------|-----------------------------|--------------------------------------------------|-------------------------------------------|----------------------------------------------------------|-------------------------------------------------|
|           |     |        |                                              |                             | SARS-CoV-2/UT-NC002-1T/Human/2020/Tokyo (A)      | hCoV-19/Japan/TY41-795/2022 (Omicron XBB) | hCoV-19/USA/MD-HP40900-PIDYSWHNUB/2022 (Omicron XBB.1.5) | hCoV-19/Japan/TY41-951/2023 (Omicron XBB.1.9.1) |
| HP(H)-019 | 57  | F      | 50                                           | BNT162b2 x 3, mRNA-1273 x 1 | 1505                                             | 22                                        | 37                                                       | 11                                              |
| HP(H)-088 | 46  | F      | 43                                           | BNT162b2 x 3, mRNA-1273 x 1 | 2085                                             | 49                                        | 91                                                       | 29                                              |
| HP(H)-101 | 48  | M      | 73                                           | BNT162b2 x 3, mRNA-1273 x 1 | 949                                              | 23                                        | 34                                                       | <10                                             |
| HP(H)-131 | 62  | M      | 62                                           | BNT162b2 x 3, mRNA-1273 x 1 | 730                                              | 17                                        | 28                                                       | <10                                             |
| HP(H)-148 | 44  | F      | 53                                           | BNT162b2 x 3, mRNA-1273 x 1 | 832                                              | 22                                        | 42                                                       | <10                                             |
| HP(H)-152 | 53  | F      | 82                                           | BNT162b2 x 3, mRNA-1273 x 1 | 1217                                             | 51                                        | 57                                                       | <10                                             |
| HP(H)-158 | 29  | F      | 41                                           | BNT162b2 x 3, mRNA-1273 x 1 | 743                                              | <10                                       | <10                                                      | <10                                             |
| HP(H)-160 | 62  | F      | 91                                           | BNT162b2 x 4                | 1430                                             | 13                                        | 64                                                       | <10                                             |
| HP(H)-172 | 52  | F      | 76                                           | BNT162b2 x 3, mRNA-1273 x 1 | 508                                              | 20                                        | 25                                                       | <10                                             |
| HP(H)-173 | 39  | M      | 82                                           | BNT162b2 x 3, mRNA-1273 x 1 | 413                                              | <10                                       | <10                                                      | <10                                             |
| HP(H)-179 | 51  | F      | 48                                           | BNT162b2 x 3, mRNA-1273 x 1 | 771                                              | 27                                        | 48                                                       | <10                                             |
| HP(H)-185 | 48  | F      | 50                                           | BNT162b2 x 3, mRNA-1273 x 1 | 3398                                             | 54                                        | 73                                                       | 21                                              |
| HP(H)-189 | 57  | F      | 68                                           | BNT162b2 x 4                | 1098                                             | 86                                        | 31                                                       | 10                                              |
| HP(H)-215 | 49  | M      | 73                                           | BNT162b2 x 3, mRNA-1273 x 1 | 160                                              | <10                                       | <10                                                      | <10                                             |
| HP(H)-228 | 49  | F      | 51                                           | BNT162b2 x 3, mRNA-1273 x 1 | 1492                                             | 21                                        | 38                                                       | <10                                             |
| HP(H)-241 | 62  | F      | 57                                           | BNT162b2 x 4                | 1211                                             | 29                                        | 34                                                       | <10                                             |
| HP(H)-248 | 59  | F      | 52                                           | BNT162b2 x 3, mRNA-1273 x 1 | 754                                              | 20                                        | 40                                                       | <10                                             |
| HP(H)-252 | 49  | M      | 77                                           | BNT162b2 x 3, mRNA-1273 x 1 | 512                                              | 19                                        | 50                                                       | <10                                             |
| HP(H)-282 | 43  | M      | 48                                           | BNT162b2 x 3, mRNA-1273 x 1 | 513                                              | <10                                       | 13                                                       | <10                                             |
| HP(H)-297 | 56  | M      | 45                                           | BNT162b2 x 3, mRNA-1273 x 1 | 1849                                             | 128                                       | 250                                                      | 98                                              |
| HP(H)-299 | 53  | F      | 53                                           | BNT162b2 x 3, mRNA-1273 x 1 | 961                                              | <10                                       | <10                                                      | <10                                             |
| HP(H)-300 | 72  | F      | 96                                           | BNT162b2 x 4                | 670                                              | 24                                        | 51                                                       | 17                                              |

**Table S2. Neutralizing antibody titers of human plasma from individuals who received the bivalent (ancestral and BA.4/5) mRNA vaccine after four doses of COVID-19 mRNA vaccine, related to Figure 1**

| Sample ID | Age | Gender | Plasma collection day post-final vaccination | Vaccine                     | FRNT50: 50% focus reduction neutralization titer |                                           |                                                          |                                                 |
|-----------|-----|--------|----------------------------------------------|-----------------------------|--------------------------------------------------|-------------------------------------------|----------------------------------------------------------|-------------------------------------------------|
|           |     |        |                                              |                             | SARS-CoV-2/UT-NC002-1T/Human/2020/Tokyo (A)      | hCoV-19/Japan/TY41-795/2022 (Omicron XBB) | hCoV-19/USA/MD-HP40900-PIDYSWHNUB/2022 (Omicron XBB.1.5) | hCoV-19/Japan/TY41-951/2023 (Omicron XBB.1.9.1) |
| HP(H)-019 | 57  | F      | 50                                           | BNT162b2 x 3, mRNA-1273 x 1 | 1505                                             | 22                                        | 37                                                       | 11                                              |
| HP(H)-088 | 46  | F      | 43                                           | BNT162b2 x 3, mRNA-1273 x 1 | 2085                                             | 49                                        | 91                                                       | 29                                              |
| HP(H)-101 | 48  | M      | 73                                           | BNT162b2 x 3, mRNA-1273 x 1 | 949                                              | 23                                        | 34                                                       | <10                                             |
| HP(H)-131 | 62  | M      | 62                                           | BNT162b2 x 3, mRNA-1273 x 1 | 730                                              | 17                                        | 28                                                       | <10                                             |
| HP(H)-148 | 44  | F      | 53                                           | BNT162b2 x 3, mRNA-1273 x 1 | 832                                              | 22                                        | 42                                                       | <10                                             |
| HP(H)-152 | 53  | F      | 82                                           | BNT162b2 x 3, mRNA-1273 x 1 | 1217                                             | 51                                        | 57                                                       | <10                                             |
| HP(H)-158 | 29  | F      | 41                                           | BNT162b2 x 3, mRNA-1273 x 1 | 743                                              | <10                                       | <10                                                      | <10                                             |
| HP(H)-160 | 62  | F      | 91                                           | BNT162b2 x 4                | 1430                                             | 13                                        | 64                                                       | <10                                             |
| HP(H)-172 | 52  | F      | 76                                           | BNT162b2 x 3, mRNA-1273 x 1 | 508                                              | 20                                        | 25                                                       | <10                                             |
| HP(H)-173 | 39  | M      | 82                                           | BNT162b2 x 3, mRNA-1273 x 1 | 413                                              | <10                                       | <10                                                      | <10                                             |
| HP(H)-179 | 51  | F      | 48                                           | BNT162b2 x 3, mRNA-1273 x 1 | 771                                              | 27                                        | 48                                                       | <10                                             |
| HP(H)-185 | 48  | F      | 50                                           | BNT162b2 x 3, mRNA-1273 x 1 | 3398                                             | 54                                        | 73                                                       | 21                                              |
| HP(H)-189 | 57  | F      | 68                                           | BNT162b2 x 4                | 1098                                             | 86                                        | 31                                                       | 10                                              |
| HP(H)-215 | 49  | M      | 73                                           | BNT162b2 x 3, mRNA-1273 x 1 | 160                                              | <10                                       | <10                                                      | <10                                             |
| HP(H)-228 | 49  | F      | 51                                           | BNT162b2 x 3, mRNA-1273 x 1 | 1492                                             | 21                                        | 38                                                       | <10                                             |
| HP(H)-241 | 62  | F      | 57                                           | BNT162b2 x 4                | 1211                                             | 29                                        | 34                                                       | <10                                             |
| HP(H)-248 | 59  | F      | 52                                           | BNT162b2 x 3, mRNA-1273 x 1 | 754                                              | 20                                        | 40                                                       | <10                                             |
| HP(H)-252 | 49  | M      | 77                                           | BNT162b2 x 3, mRNA-1273 x 1 | 512                                              | 19                                        | 50                                                       | <10                                             |
| HP(H)-282 | 43  | M      | 48                                           | BNT162b2 x 3, mRNA-1273 x 1 | 513                                              | <10                                       | 13                                                       | <10                                             |
| HP(H)-297 | 56  | M      | 45                                           | BNT162b2 x 3, mRNA-1273 x 1 | 1849                                             | 128                                       | 250                                                      | 98                                              |
| HP(H)-299 | 53  | F      | 53                                           | BNT162b2 x 3, mRNA-1273 x 1 | 961                                              | <10                                       | <10                                                      | <10                                             |
| HP(H)-300 | 72  | F      | 96                                           | BNT162b2 x 4                | 670                                              | 24                                        | 51                                                       | 17                                              |

**Table S3. Neutralizing antibody titers of human plasma from individuals who were infected with the Omicron BA.2 variant after three doses of COVID-19 mRNA vaccine, related to Figure 1**

| Sample ID   | Age | Gender | Plasma collection day post-onset | Vaccine                     | FRNT50: 50% focus reduction neutralization titer |                                           |                                                          |                                                 |
|-------------|-----|--------|----------------------------------|-----------------------------|--------------------------------------------------|-------------------------------------------|----------------------------------------------------------|-------------------------------------------------|
|             |     |        |                                  |                             | SARS-CoV-2/UT-NC002-1T/Human/2020/Tokyo (A)      | hCoV-19/Japan/TY41-795/2022 (Omicron XBB) | hCoV-19/USA/MD-HP40900-PIDYSWHNJB/2022 (Omicron XBB.1.5) | hCoV-19/Japan/TY41-951/2023 (Omicron XBB.1.9.1) |
| HPCo-383    | 56  | F      | 29                               | mRNA-1273 x 2, BNT162b2 x 1 | 508                                              | <10                                       | 18                                                       | <10                                             |
| HP-S(H)0377 | 29  | M      | 44                               | BNT162b2 x 3                | 693                                              | 98                                        | 51                                                       | 44                                              |
| HP-S(H)0380 | 22  | M      | 42                               | BNT162b2 x 3                | 3574                                             | 62                                        | 39                                                       | 20                                              |
| HP-S(H)0381 | 22  | M      | 44                               | BNT162b2 x 3                | 1094                                             | 18                                        | 22                                                       | 12                                              |
| HP-S(H)0382 | 21  | M      | 44                               | BNT162b2 x 3                | 5413                                             | 97                                        | 57                                                       | 218                                             |
| HP-S(H)0383 | 18  | M      | 42                               | BNT162b2 x 3                | 3838                                             | 45                                        | 72                                                       | 160                                             |
| HP-S(H)0882 | 23  | M      | 89                               | BNT162b2 x 3                | 1022                                             | 24                                        | 26                                                       | <10                                             |
| HP-S(H)0883 | 24  | M      | 84                               | BNT162b2 x 3                | 3619                                             | 86                                        | 76                                                       | 29                                              |
| HP-S(H)0888 | 21  | M      | 89                               | BNT162b2 x 3                | 6092                                             | 66                                        | 74                                                       | 50                                              |
| HP-S(H)1056 | 22  | M      | 42                               | BNT162b2 x 3                | 6857                                             | 112                                       | 148                                                      | 79                                              |
